# Supplementary material for: Enantioselective synthesis of α,α-difluoro-β-lactams using amino alcohol ligands
Source: Royal Society of Chemistry journal article supplement (doi:10.1039/c4ob01184h), 2014-01-01
Supplement: c4ob01184h1.pdf [file c4ob01184h1.pdf]

## Enantioselective synthesis of $\alpha,\alpha$ -fluoro- $\beta$ -lactams using amino alcohol ligands

Atsushi Tarui,<sup>†</sup> Takeshi Ikebata,<sup>†</sup> Asuka Tahira,<sup>†</sup> Kazuyuki Sato,<sup>†</sup> Masaaki Omote,<sup>†</sup>  
Akira Ando<sup>\*,†</sup>

<sup>†</sup>Faculty of Pharmaceutical Sciences, Setsunan University, 45-1, Nagaotoge-cho, Hirakata,  
Osaka 573-0101, Japan

[tarui-a@pharm.setsunan.ac.jp](mailto:tarui-a@pharm.setsunan.ac.jp), [aando@pharm.setsunan.ac.jp](mailto:aando@pharm.setsunan.ac.jp)

### SUPPORTING INFORMATION

#### List of contents

|                                                       |        |
|-------------------------------------------------------|--------|
| Screening of reaction conditions                      | S2     |
| Copies of <sup>1</sup> H and <sup>13</sup> C NMR 3a-h | S3-11  |
| Copies of HPLC chromatograms of the products          | S12-15 |

## Screening of reaction condition

### Enantioselective imino-Reformatsky reaction of **1**

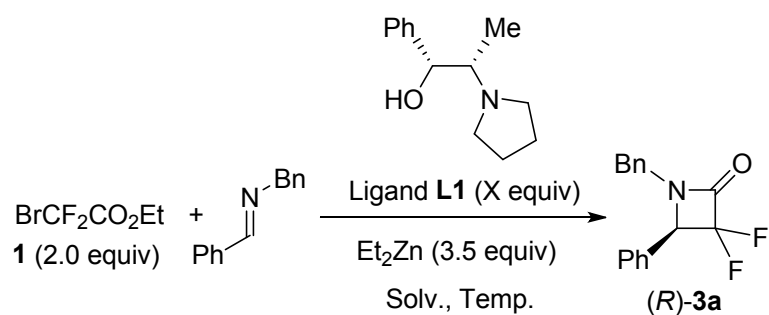

| Entry | Ligand (equiv) | Solv.                           | Temp. (°C) | Yield of <b>3a</b> (%) <sup>a</sup> | Ee of <b>3a</b> (%) |
|-------|----------------|---------------------------------|------------|-------------------------------------|---------------------|
| 1     | 1              | CH <sub>2</sub> Cl <sub>2</sub> | r.t.       | 72                                  | 91                  |
| 2     | 1              | CH <sub>2</sub> Cl <sub>2</sub> | 0          | 67                                  | 91                  |
| 3     | 1              | CH <sub>2</sub> Cl <sub>2</sub> | -40        | 62                                  | >99                 |
| 4     | 0.75           | CH <sub>2</sub> Cl <sub>2</sub> | 0          | 63                                  | 96                  |
| 5     | 0.1            | CH <sub>2</sub> Cl <sub>2</sub> | 0          | 38                                  | 5                   |
| 6     | 0.75           | DCE                             | 0          | 30                                  | 97                  |
| 7     | 0.75           | BTF                             | 0          | 19                                  | 19                  |
| 8     | none           | CH <sub>2</sub> Cl <sub>2</sub> | 0          | 62                                  | 0                   |

a: Isolated yields.



(*R*)-1-Benzyl-3,3-difluoro-4-(naphthalen-2-yl)azetidin-2-one **3b**

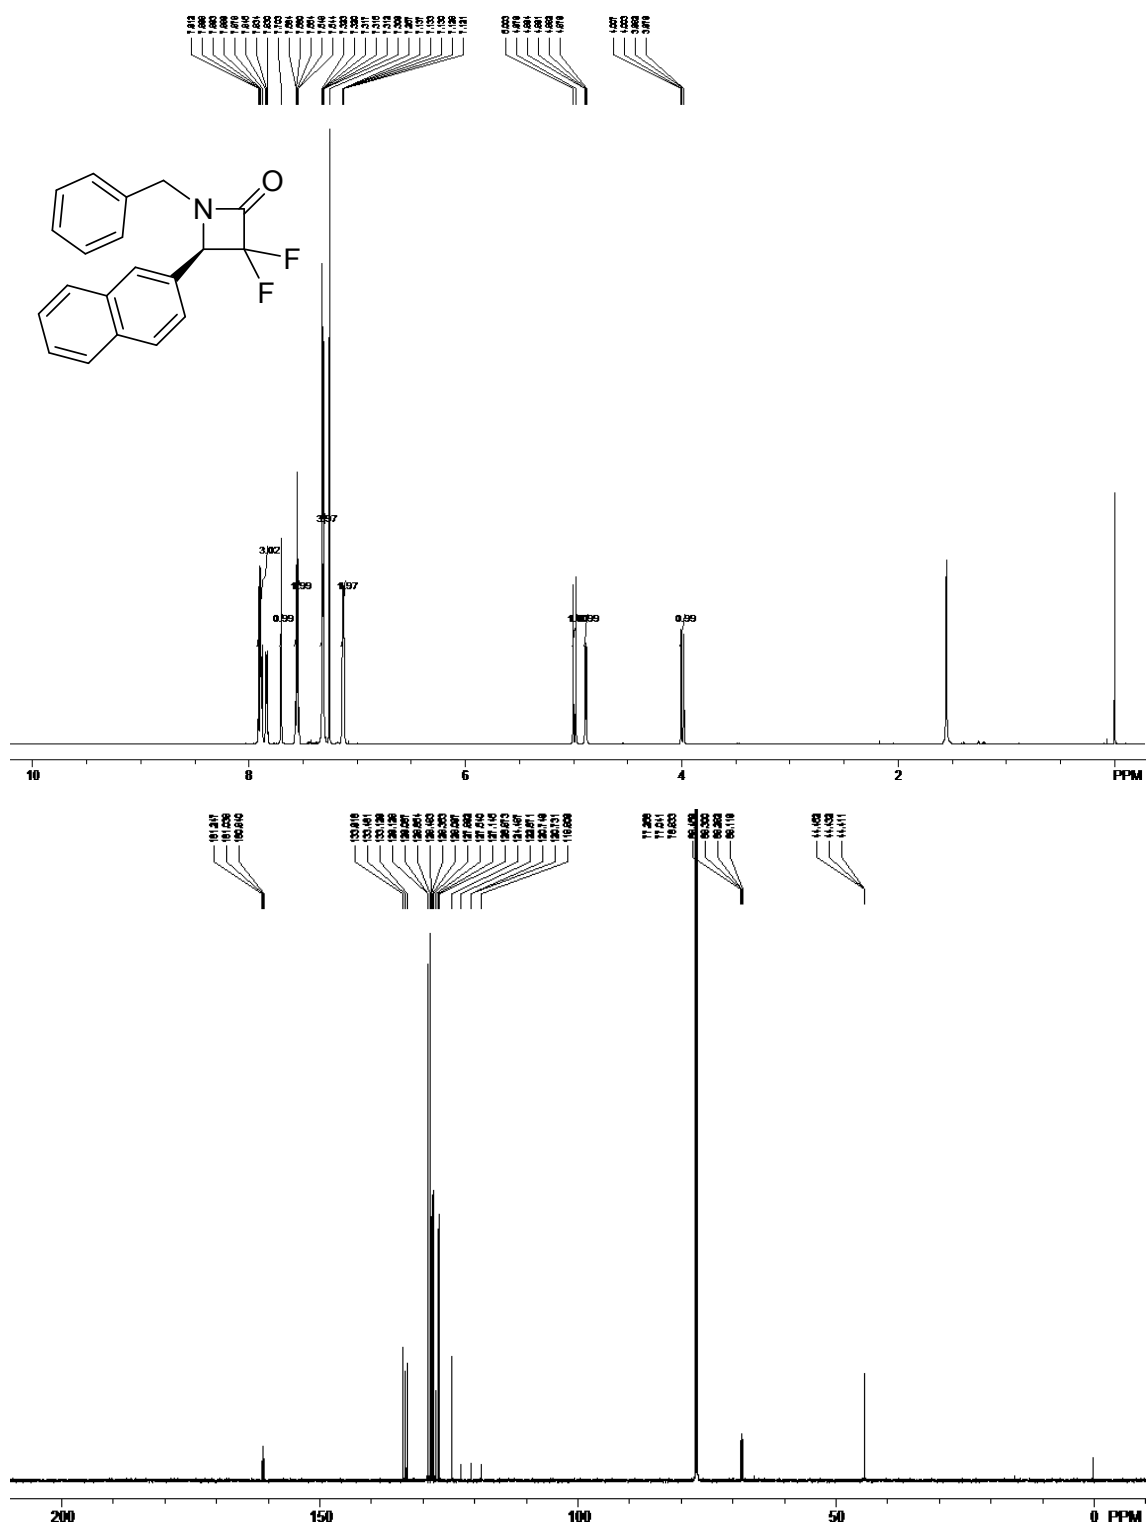

(R)-1-Benzyl-3,3-difluoro-4-[4-(trifluoromethyl)phenyl]azetidin-2-one **3c**

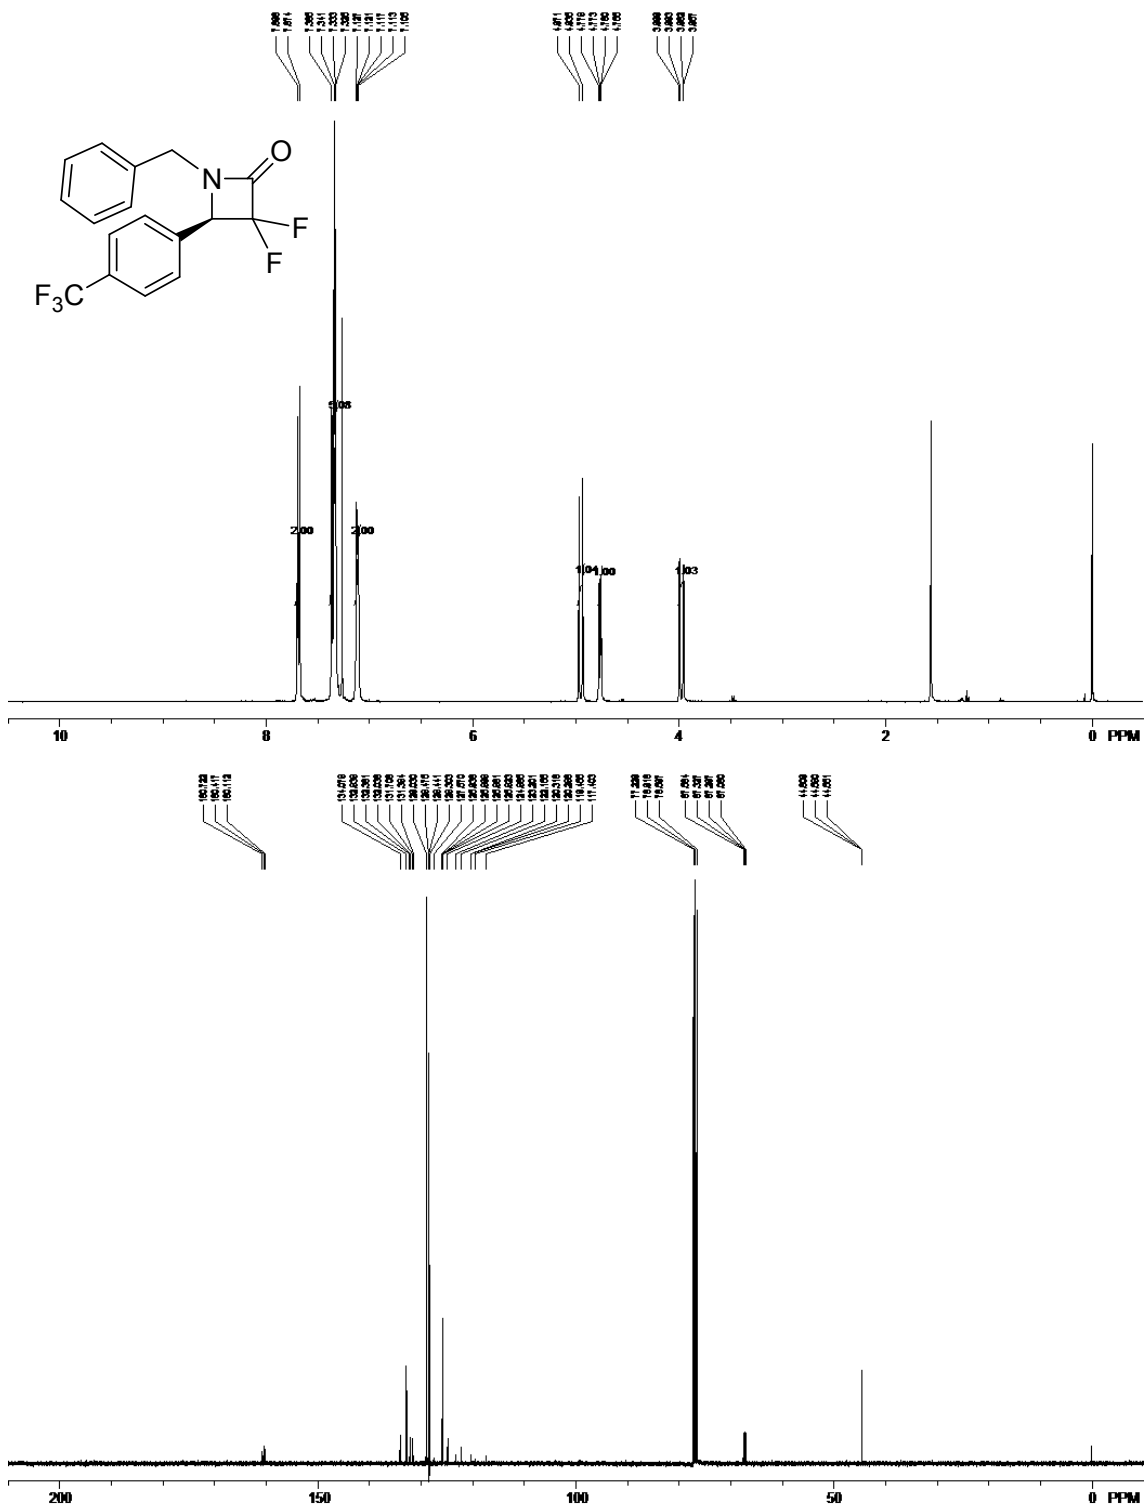

(*R*)-1-Benzyl-4-(4-chlorophenyl)-3,3-difluoroazetidin-2-one **3d**

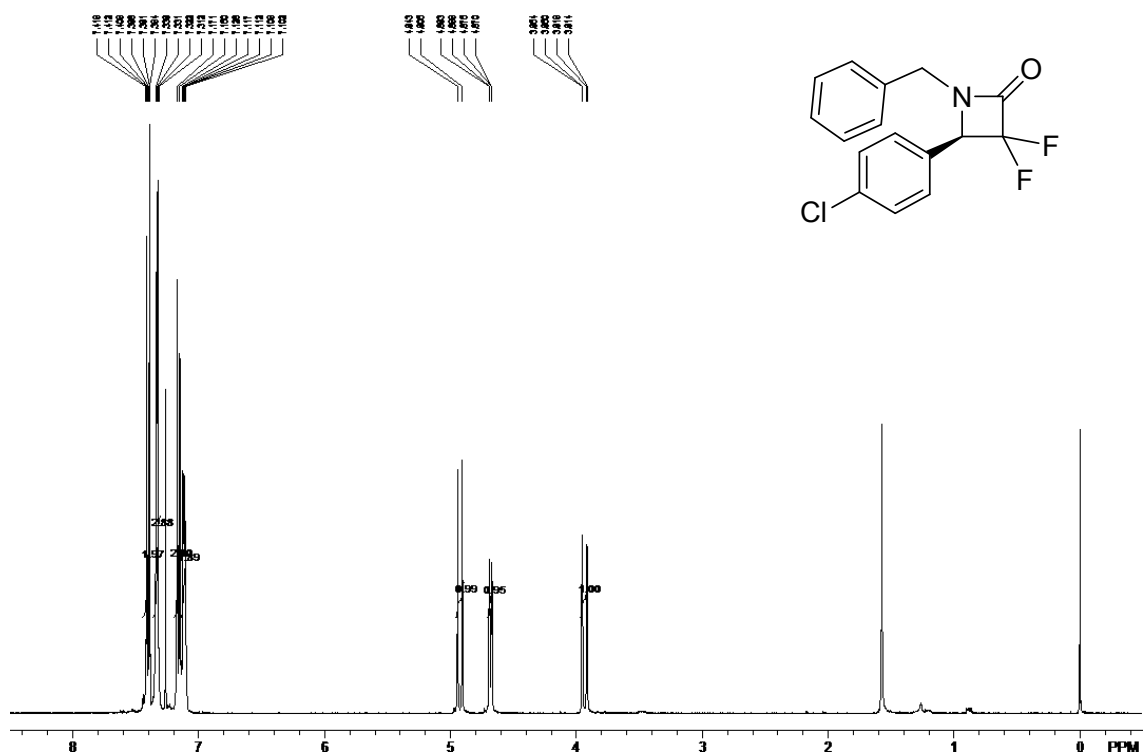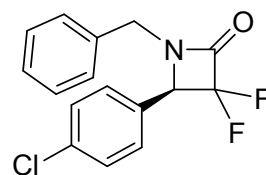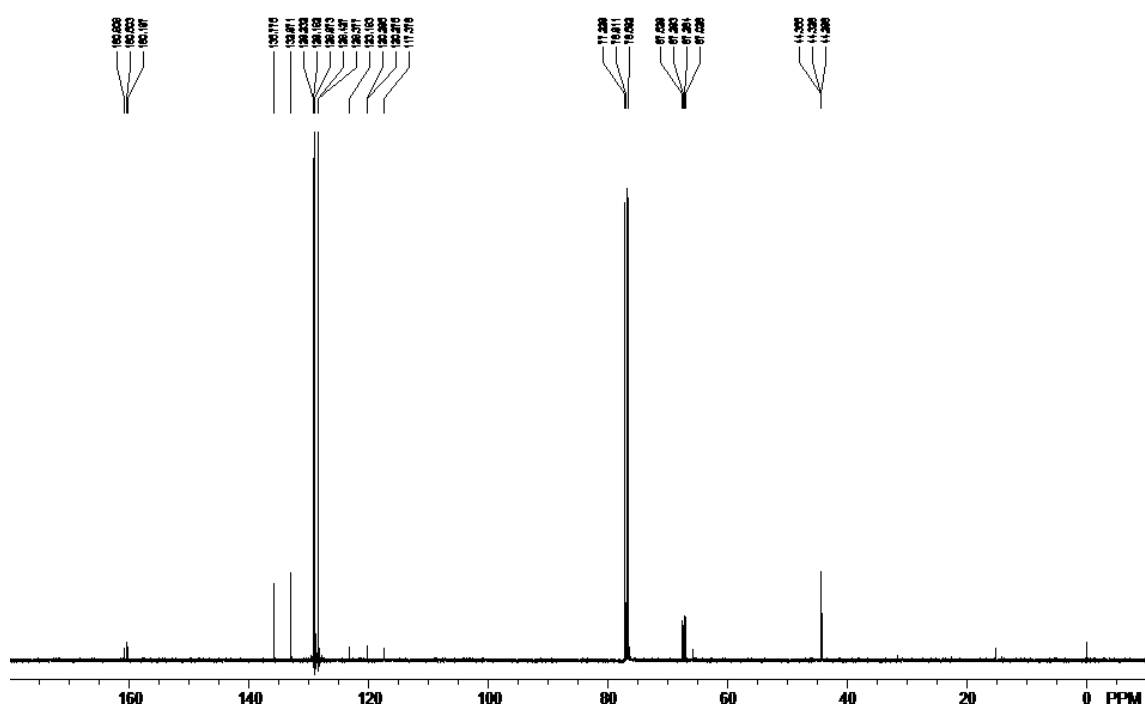



(R)-4-(1-Benzyl-3,3-difluoro-4-oxoazetidin-2-yl)benzonitrile **3f**

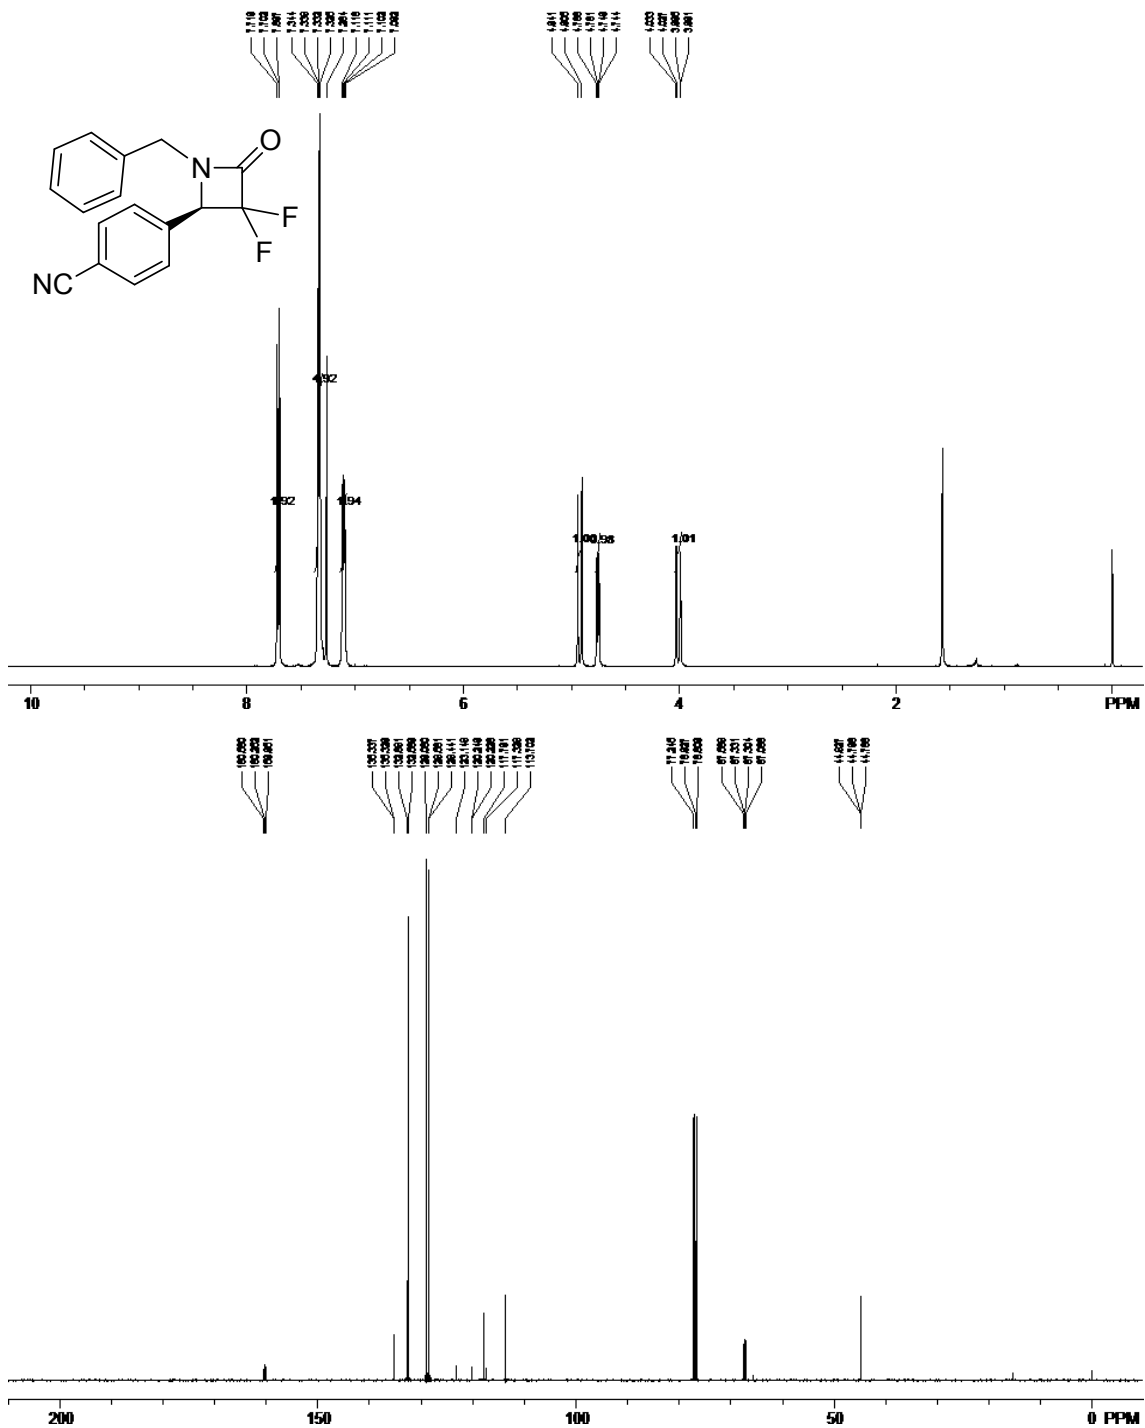



(R)-1-Benzyl-3,3-difluoro-4-(p-tolyl)azetidin-2-one **3g**

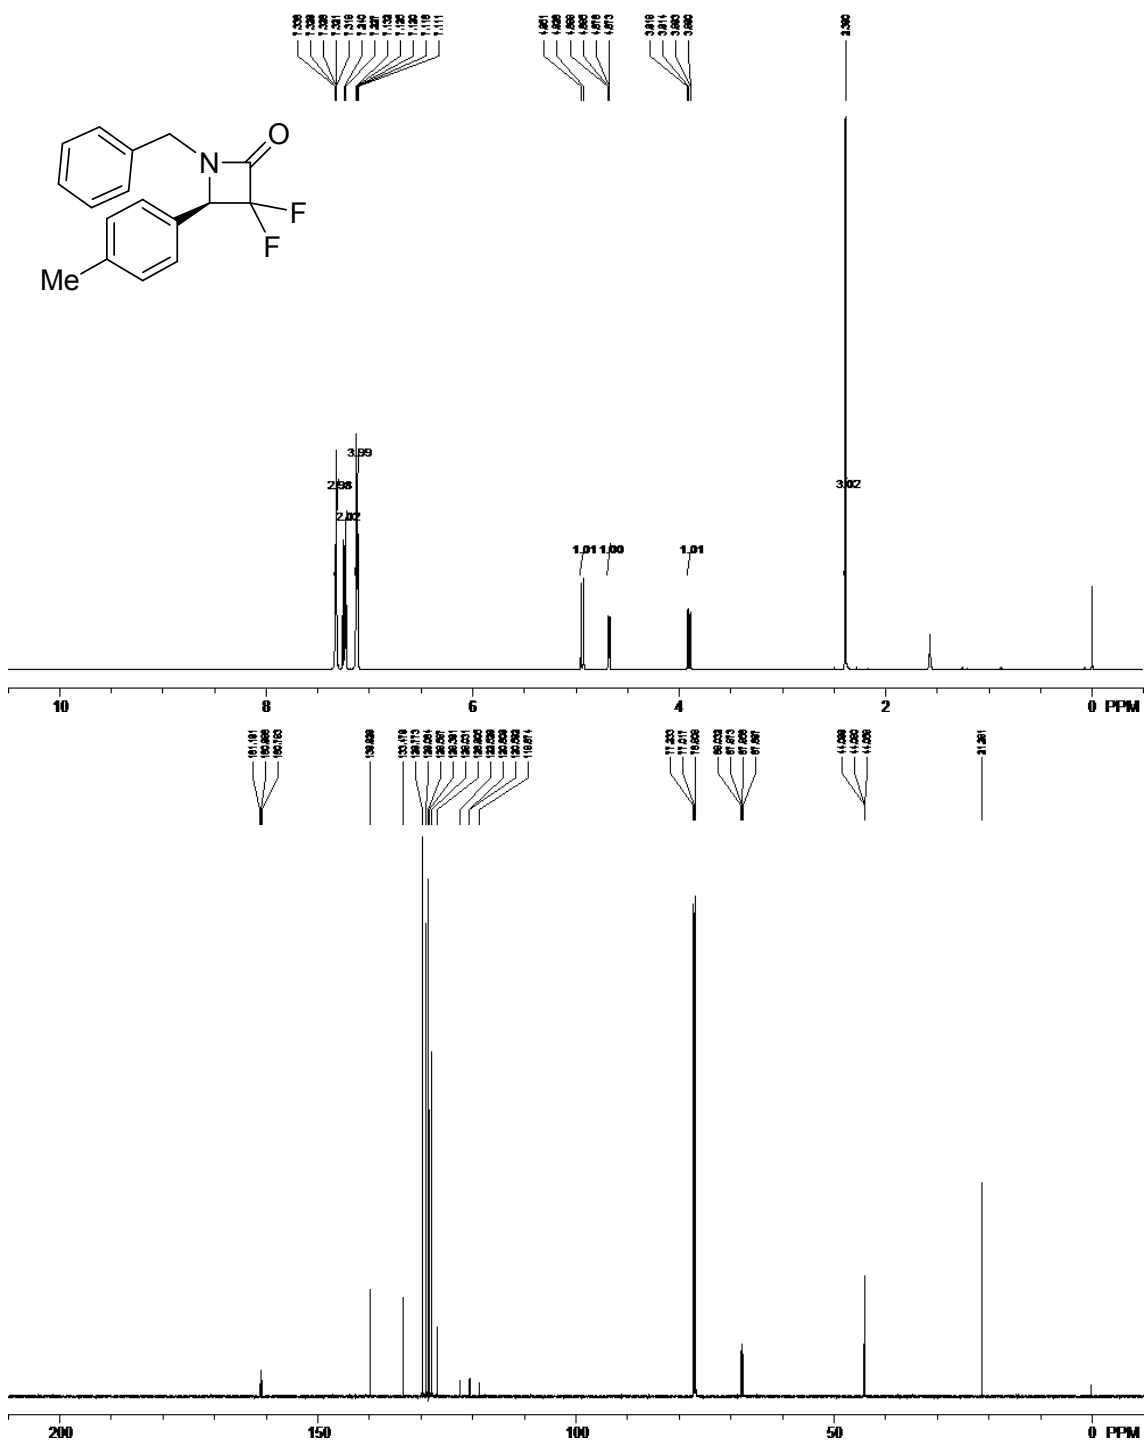



(S)-1-Benzyl-3,3-difluoro-4-phenylazetidin-2-one **3a**

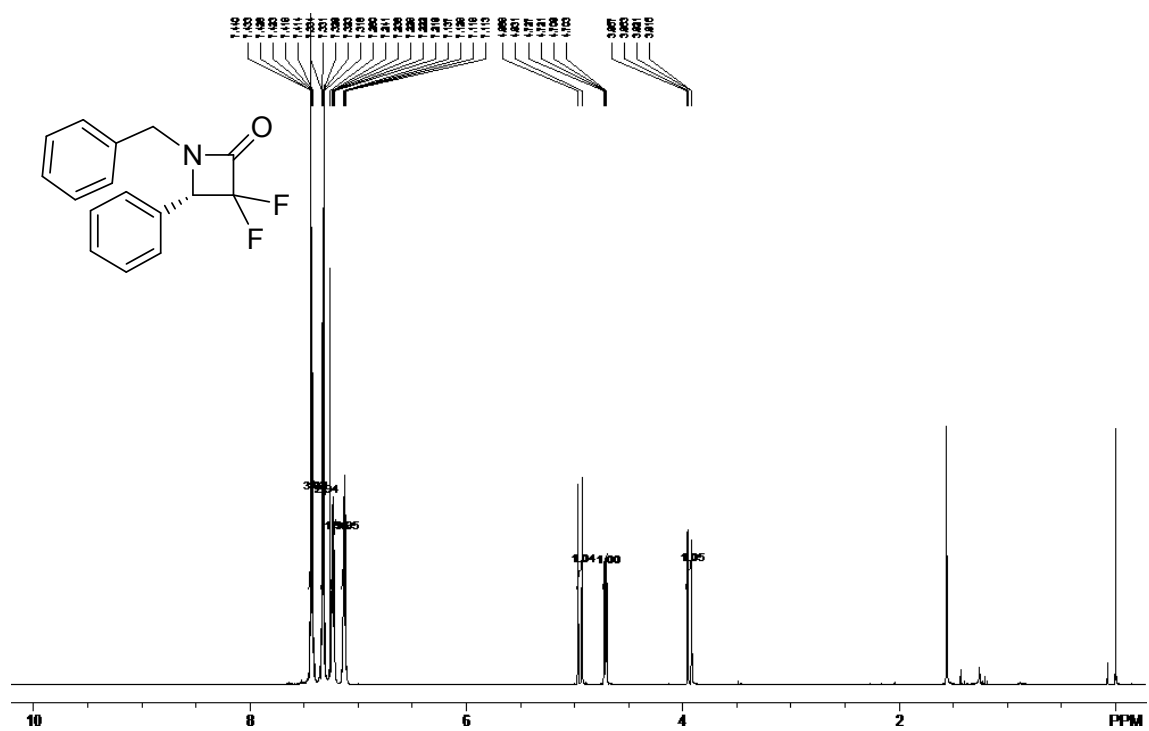

## Copies of HPLC chromatgrams of the products

The chromatgrams showed racemate charts in left column and chiral charts in right column.

### (*R*)-1-Benzyl-3,3-difluoro-4-phenylazetidin-2-one **3a**

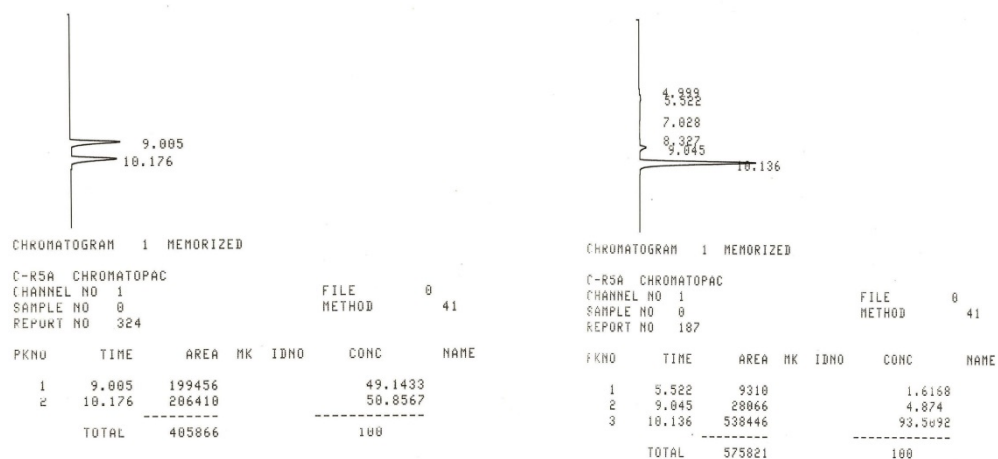

### (*R*)-1-Benzyl-3,3-difluoro-4-(naphthalen-2-yl)azetidin-2-one **3b**

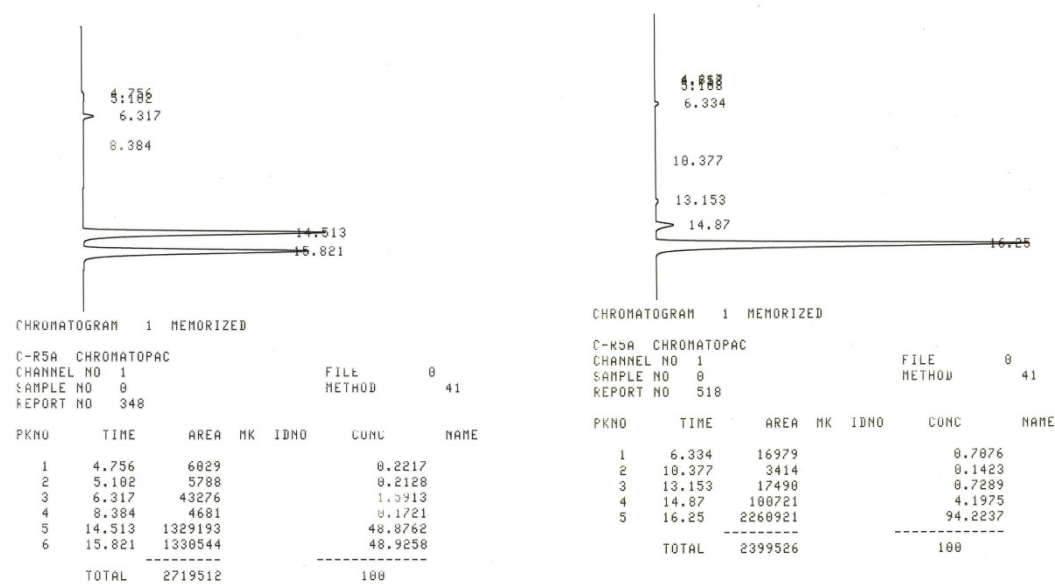

**(R)-1-Benzyl-3,3-difluoro-4-[4-(trifluoromethyl)phenyl]azetidin-2-one 3c**

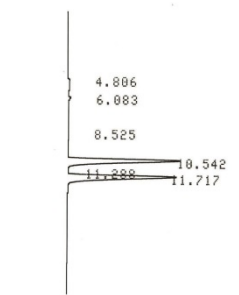

CHROMATOGRAM 1 MEMORIZED

C-RSA CHROMATOPAC  
CHANNEL NO 1  
SAMPLE NO 0  
REPORT NO 425

FILE METHOD 0 41

| PKNO  | TIME   | AREA    | MK | IDNO | CONC    | NAME |
|-------|--------|---------|----|------|---------|------|
| 1     | 4.806  | 3883    |    |      | 0.3632  |      |
| 2     | 6.083  | 9763    |    |      | 0.9132  |      |
| 3     | 8.525  | 5752    |    |      | 0.538   |      |
| 4     | 10.542 | 525625  |    |      | 49.1656 |      |
| 5     | 11.717 | 524068  |    |      | 49.02   |      |
| TOTAL |        | 1069091 |    |      | 100     |      |

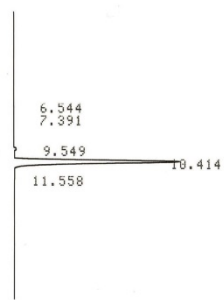

CHROMATOGRAM 1 MEMORIZED

C-RSA CHROMATOPAC  
CHANNEL NO 1  
SAMPLE NO 0  
REPORT NO 434

FILE METHOD 0 41

| PKNO  | TIME   | AREA   | MK | IDNO | CONC    | NAME |
|-------|--------|--------|----|------|---------|------|
| 1     | 6.544  | 2324   |    |      | 0.3223  |      |
| 2     | 9.549  | 12514  |    |      | 1.7354  |      |
| 3     | 10.414 | 703243 |    |      | 97.5201 |      |
| 4     | 11.558 | 3045   |    |      | 0.4222  |      |
| TOTAL |        | 721126 |    |      | 100     |      |

**(R)-1-Benzyl-4-(4-chlorophenyl)-3,3-difluoroazetidin-2-one 3d**

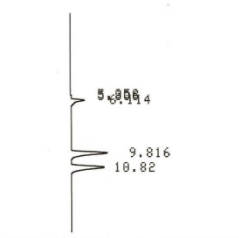

CHROMATOGRAM 1 MEMORIZED

C-RSA CHROMATOPAC  
CHANNEL NO 1  
SAMPLE NO 0  
REPORT NO 491

FILE METHOD 0 41

| PKNO  | TIME  | AREA   | MK | IDNO | CONC    | NAME |
|-------|-------|--------|----|------|---------|------|
| 1     | 6.114 | 42871  |    |      | 12.6078 |      |
| 2     | 9.816 | 149792 |    |      | 44.0522 |      |
| 3     | 10.82 | 147371 |    |      | 43.34   |      |
| TOTAL |       | 340033 |    |      | 100     |      |

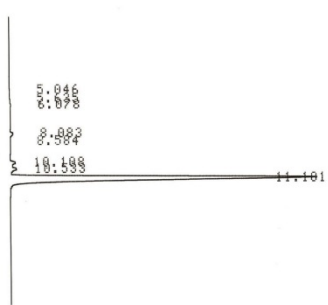

CHROMATOGRAM 1 MEMORIZED

C-RSA CHROMATOPAC  
CHANNEL NO 1  
SAMPLE NO 0  
REPORT NO 170

FILE METHOD 0 41

| PKNO  | TIME   | AREA    | MK | IDNO | CONC    | NAME |
|-------|--------|---------|----|------|---------|------|
| 1     | 5.046  | 2210    |    |      | 0.1469  |      |
| 2     | 6.078  | 3643    |    |      | 0.2422  |      |
| 3     | 8.083  | 14989   |    |      | 0.9966  |      |
| 4     | 8.584  | 3062    |    |      | 0.2036  |      |
| 5     | 10.108 | 24992   |    |      | 1.6616  |      |
| 6     | 10.533 | 29994   |    |      | 1.9942  |      |
| 7     | 11.181 | 1425183 |    |      | 94.7549 |      |
| TOTAL |        | 1504072 |    |      | 100     |      |

**(R)-1-Benzyl-3,3-difluoro-4-(4-methoxycarbonylphenyl)azetidin-2-one 3e**

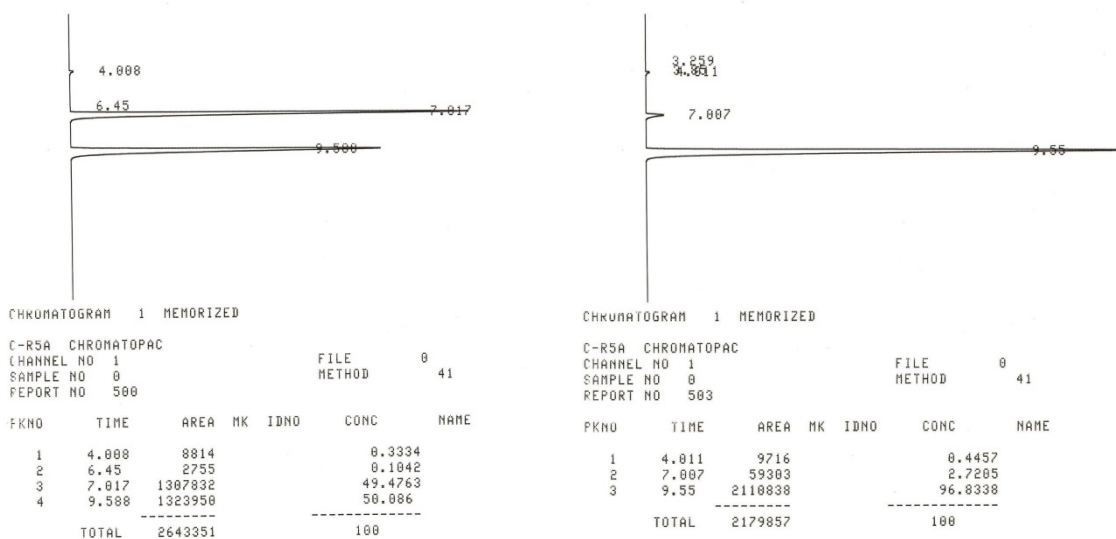

**(R)-4-(1-Benzyl-3,3-difluoro-4-oxoazetidin-2-yl)benzotrile 3f**

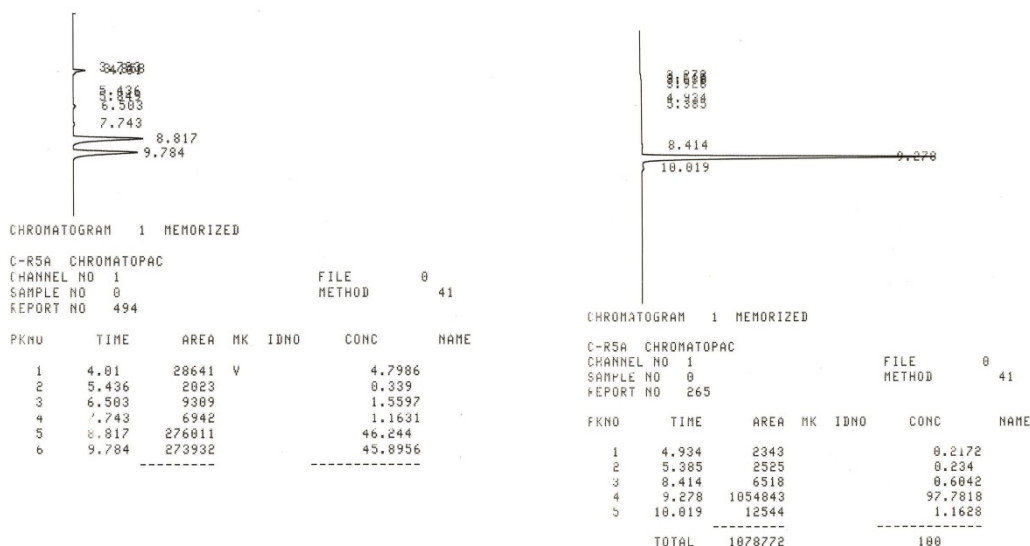

**(R)-1-Benzyl-3,3-difluoro-4-(p-tolyl)azetidin-2-one 3g**

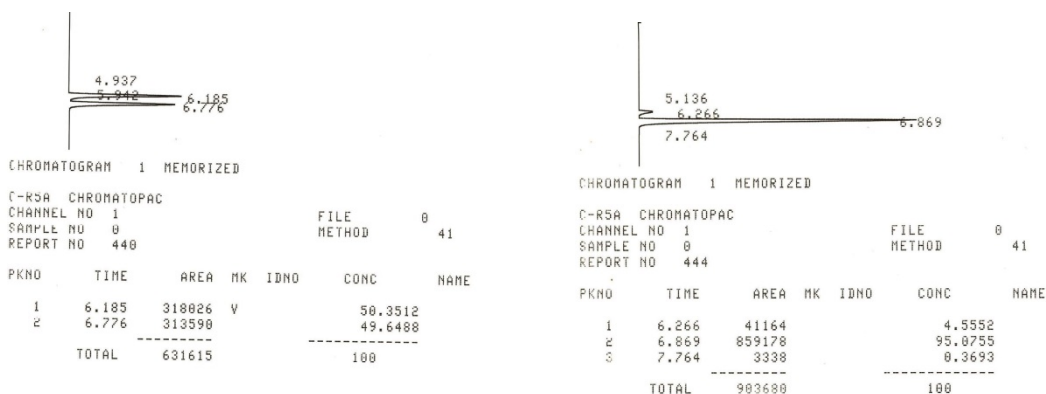



**(R)-1-Benzyl-3,3-difluoro-4-(4-methoxyphenyl)azetid-2-one 3h**

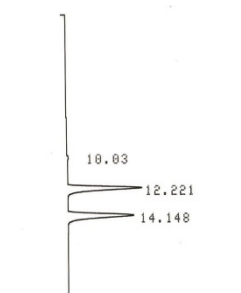

CHROMATOGRAM 1 MEMORIZED

C-R5A CHROMATOPAC  
CHANNEL NO 1  
SAMPLE NO 0  
REPORT NO 362

FILE 0  
METHOD 41

| PKNO  | TIME   | AREA   | MK | IDNO | CONC    | NAME |
|-------|--------|--------|----|------|---------|------|
| 1     | 10.03  | 6604   |    |      | 0.9038  |      |
| 2     | 12.221 | 362179 |    |      | 49.5653 |      |
| 3     | 14.148 | 361928 |    |      | 49.531  |      |
| TOTAL |        | 738711 |    |      | 100     |      |

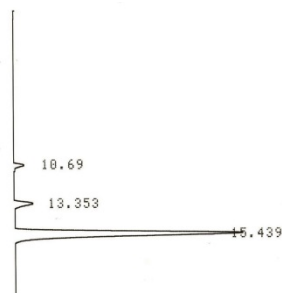

CHROMATOGRAM 1 MEMORIZED

C-R5A CHROMATOPAC  
CHANNEL NO 1  
SAMPLE NO 0  
REPORT NO 2

FILE 0  
METHOD 41

| PKNO  | TIME   | AREA    | MK | IDNO | CONC   | NAME |
|-------|--------|---------|----|------|--------|------|
| 1     | 10.69  | 45436   |    |      | 2.893  |      |
| 2     | 13.353 | 104475  |    |      | 6.652  |      |
| 3     | 15.439 | 1420657 |    |      | 90.455 |      |
| TOTAL |        | 1570568 |    |      | 100    |      |

**(S)-1-Benzyl-3,3-difluoro-4-phenylazetid-2-one 3a**

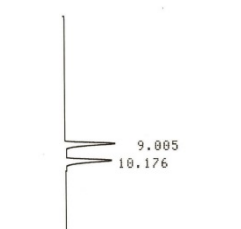

CHROMATOGRAM 1 MEMORIZED

C-R5A CHROMATOPAC  
CHANNEL NO 1  
SAMPLE NO 0  
REPORT NO 324

FILE 0  
METHOD 41

| PKNO  | TIME   | AREA   | MK | IDNO | CONC    | NAME |
|-------|--------|--------|----|------|---------|------|
| 1     | 9.005  | 199456 |    |      | 49.1433 |      |
| 2     | 10.176 | 206410 |    |      | 50.8567 |      |
| TOTAL |        | 405866 |    |      | 100     |      |

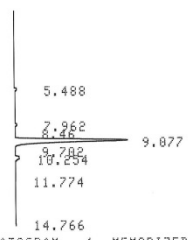

CHROMATOGRAM 1 MEMORIZED

C-R5A CHROMATOPAC  
CHANNEL NO 1  
SAMPLE NO 0  
REPORT NO 292

FILE 0  
METHOD 41

| PKNO  | TIME   | AREA   | MK | IDNO | CONC    | NAME |
|-------|--------|--------|----|------|---------|------|
| 1     | 5.488  | 9596   |    |      | 2.0006  |      |
| 2     | 7.962  | 10408  |    |      | 2.1697  |      |
| 3     | 8.46   | 3895   |    |      | 0.6451  |      |
| 4     | 9.077  | 423062 |    |      | 88.1971 |      |
| 5     | 9.702  | 2711   |    |      | 0.5652  |      |
| 6     | 10.254 | 24328  |    |      | 5.0718  |      |
| 7     | 11.774 | 3144   |    |      | 0.6554  |      |
| 8     | 14.766 | 3334   |    |      | 0.6951  |      |
| TOTAL |        | 479678 |    |      | 100     |      |
